# Supplementary material for: Brain endothelial tricellular junctions as novel sites for T cell diapedesis across the blood–brain barrier
Source: PubMed Central journal article supplement (PMC8121105; doi:10.1242/jcs.253880), 2021-04-26
Supplement: joces-134-253880-s1.pdf [file joces-134-253880-s1.pdf]

**Table S1 – List of the antibodies used in this study**

| Primary antibodies         |                                       |             |          |                                      |               |                            |
|----------------------------|---------------------------------------|-------------|----------|--------------------------------------|---------------|----------------------------|
| Antigen                    | Company                               | Catalog no. | Lot no.  | Host species                         | Concentration |                            |
|                            |                                       |             |          |                                      | Western blot  | IF staining tissue culture |
| Mouse Claudin-5            | Thermo Fisher Scientific (Invitrogen) | 34-1600     | 1105603A | Rabbit polyclonal IgG                | 1.25 µg/mL    | 1.25 µg/mL                 |
| Mouse Occludin             | Thermo Fisher Scientific (Invitrogen) | 71-1500     | RG235307 | Rabbit polyclonal IgG                | 1.25 µg/mL    | 1.25 µg/mL                 |
| Mouse β-actin              | Merck                                 | A5316       | 052M4793 | Mouse monoclonal IgG2a               | 1:3000        | n.d.                       |
| Mouse ZO-1                 | Thermo Fisher Scientific (Invitrogen) | 61-7300     | QG215368 | Rabbit polyclonal IgG                | n.d.          | 1.25 µg/mL                 |
| Mouse MARVELD2/Tricellulin | Thermo Fisher Scientific (Invitrogen) | 48-8400     | SH258222 | Rabbit polyclonal IgG                | 0.25 µg/mL    | 2 µg/mL                    |
| Mouse MARVELD2/Tricellulin | in house Furuse lab <sup>§</sup>      | n.a.        | n.a.     | Rat monoclonal IgG                   | n.d.          | supernatant undiluted      |
| Mouse LSR/angulin-1        | Merck                                 | HPA007270   | I106879  | Rabbit polyclonal IgG                | 1 µg/mL       | n.d.                       |
| Mouse LSR/angulin-1        | In house Furuse lab <sup>§</sup>      | n.a.        | n.a.     | Rat monoclonal IgG                   | n.d.          | supernatant undiluted      |
| Mouse VCAM-1               | In house                              | Clone 9DB3  | n.a.     | Monoclonal rat IgG2a                 | n.d.          | 20 µg/mL                   |
| Mouse ICAM-1               | In house                              | Clone 25ZC7 | n.a.     | Monoclonal rat IgG2a                 | n.d.          | 20 µg/mL                   |
| Mouse ICAM-1               | Custom made, Eurogentec               | n.a.        | n.a.     | Rabbit polyclonal IgG                | 1:1000        | n.d.                       |
| F-actin TRITC-Phalloidin   | Merck, Switzerland                    | P1951       |          | Amanita phalloides                   | n.d.          | 1:200                      |
| Secondary antibodies       |                                       |             |          |                                      |               |                            |
| Antigen                    | Company                               | Catalog no. | Lot no.  | Antibody/ reagent                    | Concentration |                            |
|                            |                                       |             |          |                                      | Western blot  | IF staining tissue culture |
| Rabbit IgG (H+L)           | Thermo Fisher Scientific (Invitrogen) | A21109      | 1716991  | Goat polyclonal IgG Alexa Fluor® 680 | 1:10000       | n.d.                       |
| Mouse IgG (H+L)            | Rockland Immunochemicals              | 605-732-125 | 17583    | Goat polyclonal IgG IRDye® TM 800    | 1:10000       | n.d.                       |
| Rat IgG (H+L)              | Jackson ImmunoResearch                | 112-165-003 | 2338240  | Goat polyclonal IgG Cy3              | n.d.          | 1:200                      |
| Rabbit IgG (H+L)           | Thermo Fisher Scientific (Invitrogen) | A27034      | 1214851  | Goat polyclonal IgG Alexa Fluor® 488 | n.d.          | 1:200                      |

\*IF – immunofluorescence; <sup>§</sup> n.d. – not done; <sup>§</sup>n.a. – not applicable; &(Iwamoto et al., 2014)

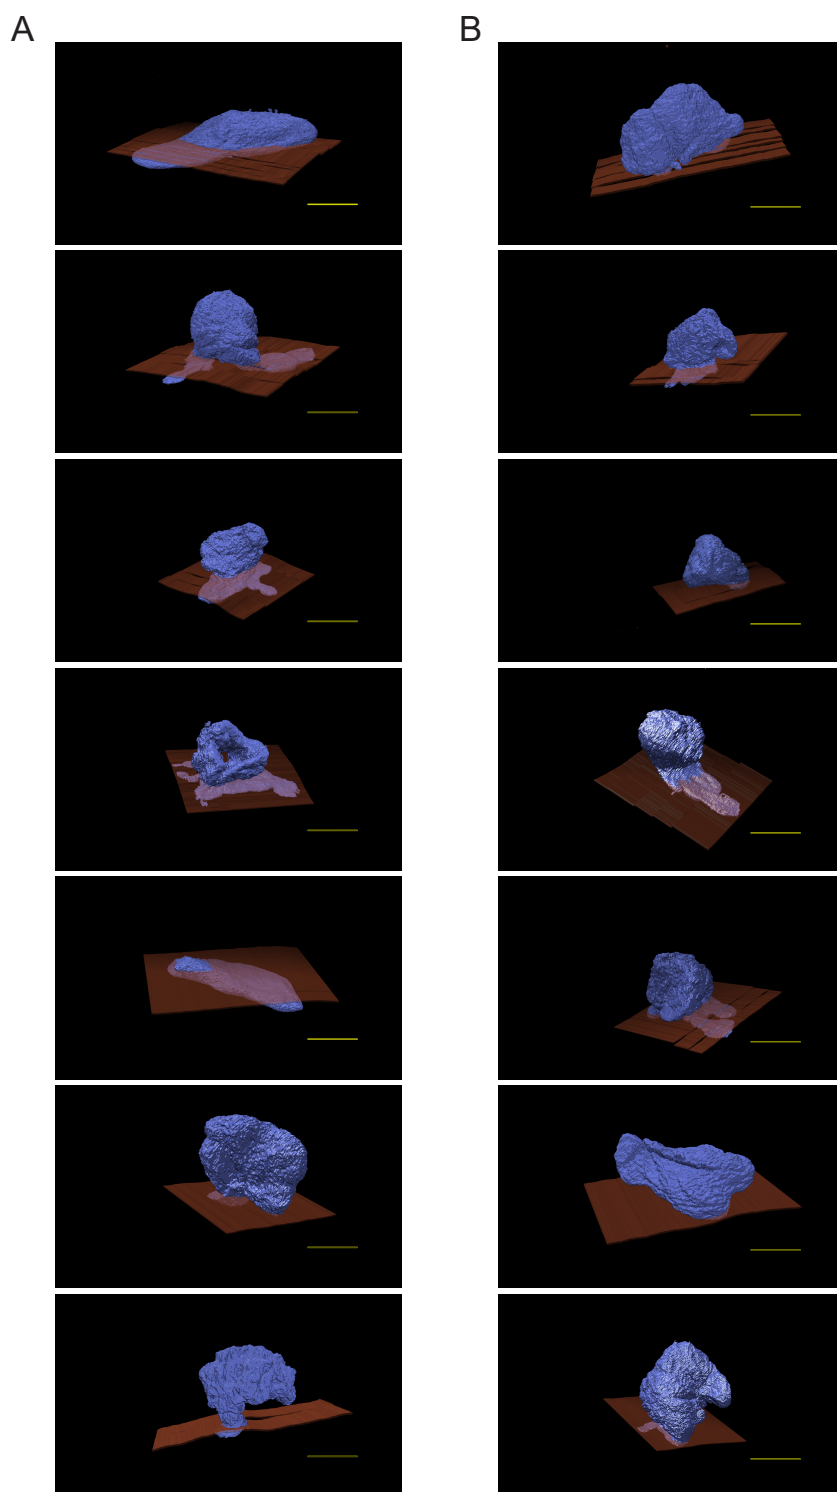

**Figure S1** - 3D segmentation of the morphology of 14 T-cell nuclei, interacting with either IL-1 $\beta$ <sup>lo</sup> or IL-1 $\beta$ <sup>hi</sup> stimulated pMBMECs (A and B, respectively). Scale bar = 5  $\mu$ m



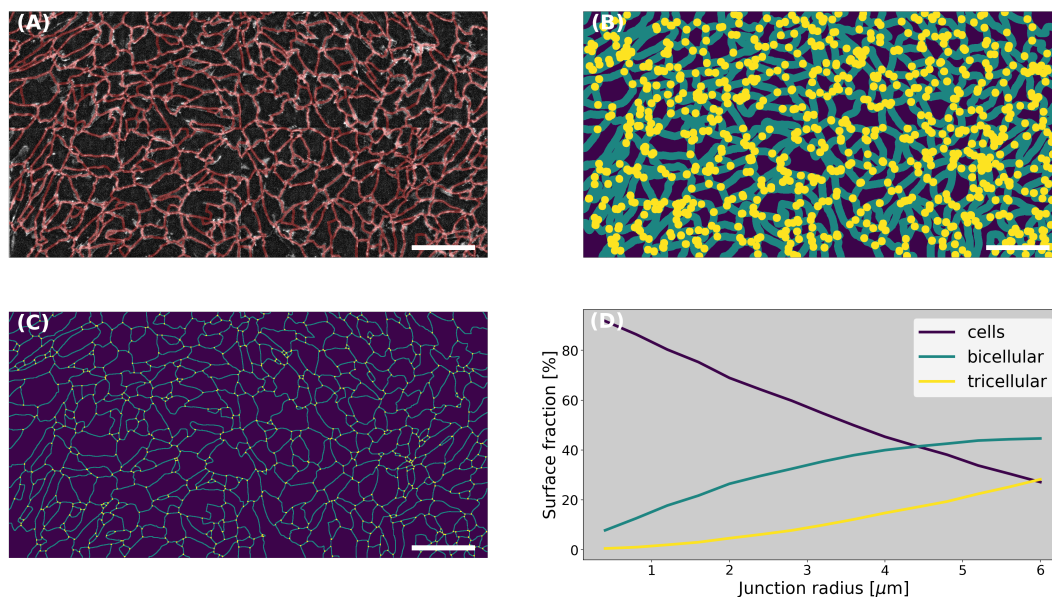

**Figure S2 – Radomization of the cellular pathway of T-cell diapedesis across pMBMEC monolayers**

**(A)** Boundary segmentation (red lines) of a VE-cadherin-GFP pMBMEC monolayer is shown.

Underlying GFP<sup>+</sup> pMBMEC junctions are visible in grey. **(B,C)** Maps assuming a 6  $\mu\text{m}$  (B) or 1  $\mu\text{m}$  (C)

radius for the junctions. Paracellular junctions shown in green, tricellular junctions in yellow. **(D)**

shows the fraction of pixels belonging to a given category as a function of the junction radius. With

increasing radius, the surface fraction of the junctions becomes larger while the fraction of pixels

for the cell surface becomes smaller. Although this model does not allow to estimate the true

thickness of junctions, it allows to determine that only under the assumption of very large radii (> 4

$\mu\text{m}$ ) cellular junctions become dominant in the null model. Scale bar = 100 $\mu\text{m}$ .

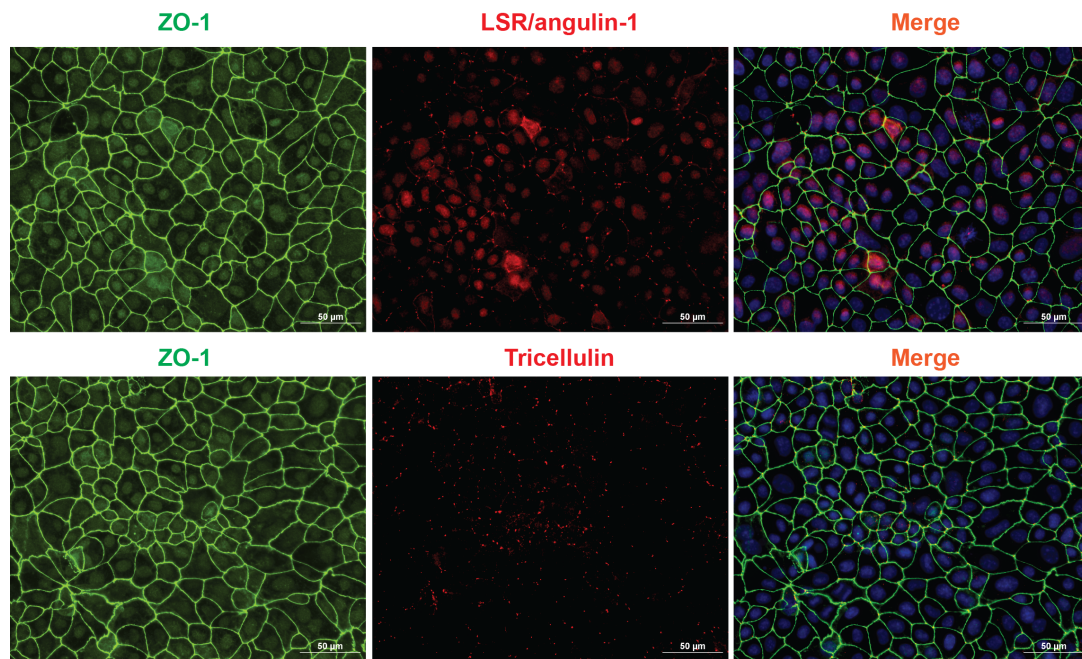

**Figure S3 – Detection of tricellulin and LSR/angulin-1 in epithelial monolayers**

Immunofluorescence staining of ZO-1 (green) and tricellulin and LSR/angulin-1 (red) in EpH4 monolayers. Scale bar = 50µm.

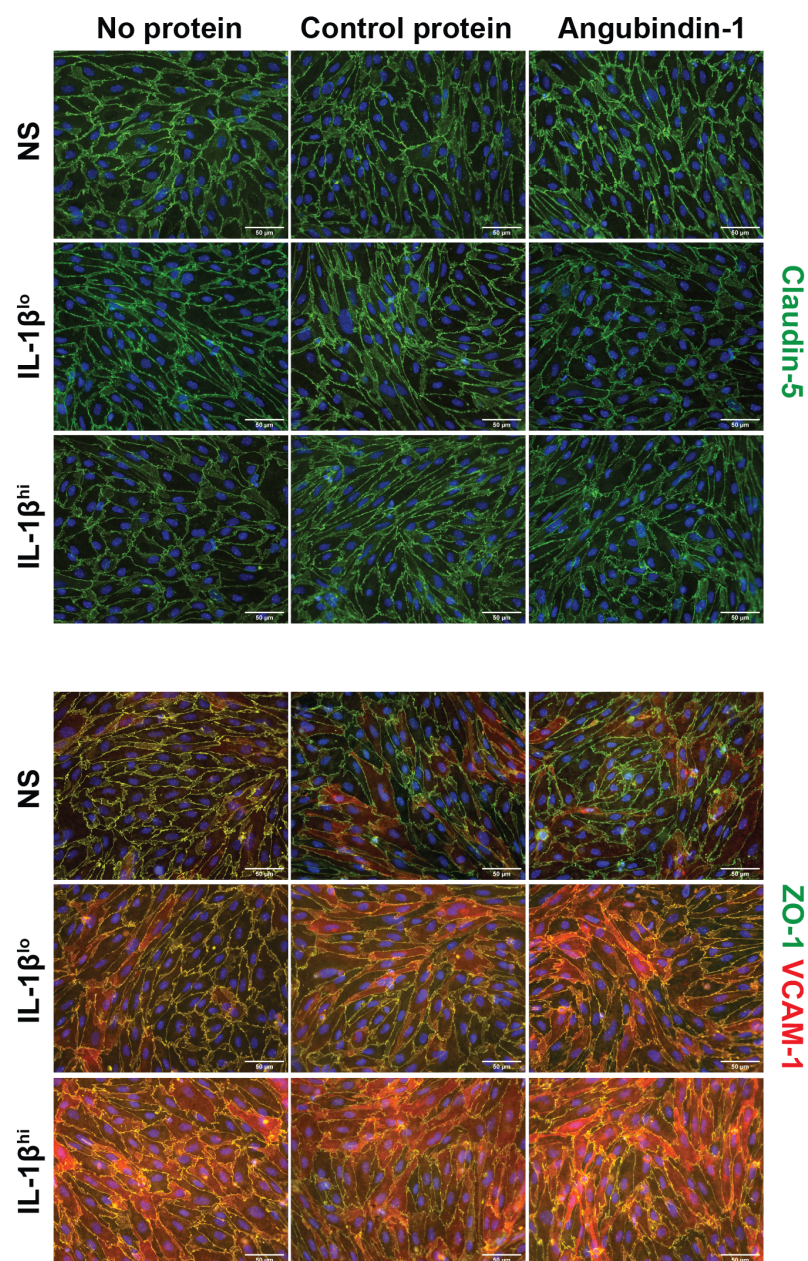

**Figure S4 – Protein-targeting of angulin-1 reduces paracellular T-cell diapedesis**

Immunofluorescence staining of claudin-5 and ZO-1 (green) and VCAM-1 (red) in pMBMEC monolayers. Comparable staining was obtained for these proteins, in either unstimulated, IL-1 $\beta$ <sup>lo</sup> or IL-1 $\beta$ <sup>hi</sup> stimulated pMBMECs, in the presence or absence of absence of angubindin-1. Nuclei were stained with DAPI in blue. Three independent experiments were performed. Scale bar = 50 $\mu$ m.



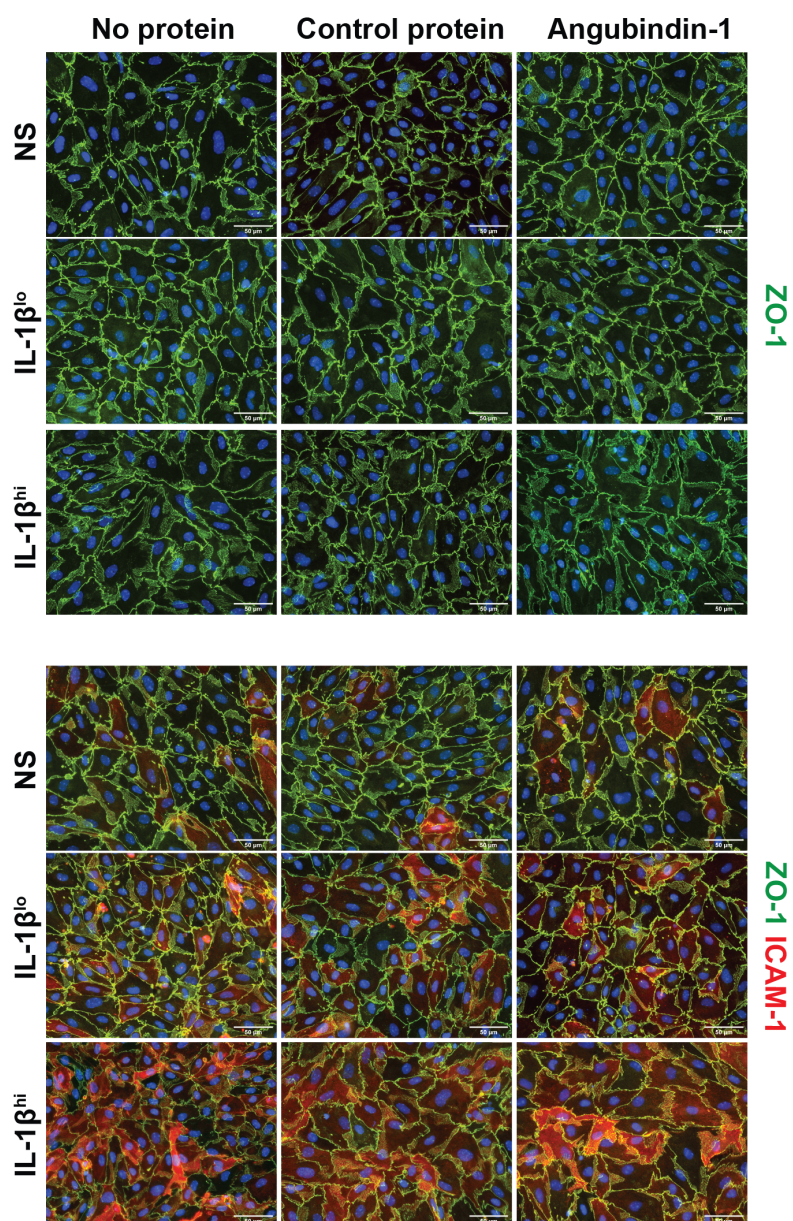

**Figure S5 - Protein-targeting of angubindin-1 reduces paracellular T-cell diapedesis**

Immunofluorescence staining of ZO-1 (green) and ICAM-1 (red) in pMBMEC monolayers. Comparable staining was obtained for these proteins, in either unstimulated, IL-1 $\beta$ <sup>lo</sup> or IL-1 $\beta$ <sup>hi</sup> stimulated pMBMECs, in the presence or absence of angubindin-1. Nuclei are stained with DAPI in blue. Three independent experiments were performed. Scale bar = 50 $\mu$ m.

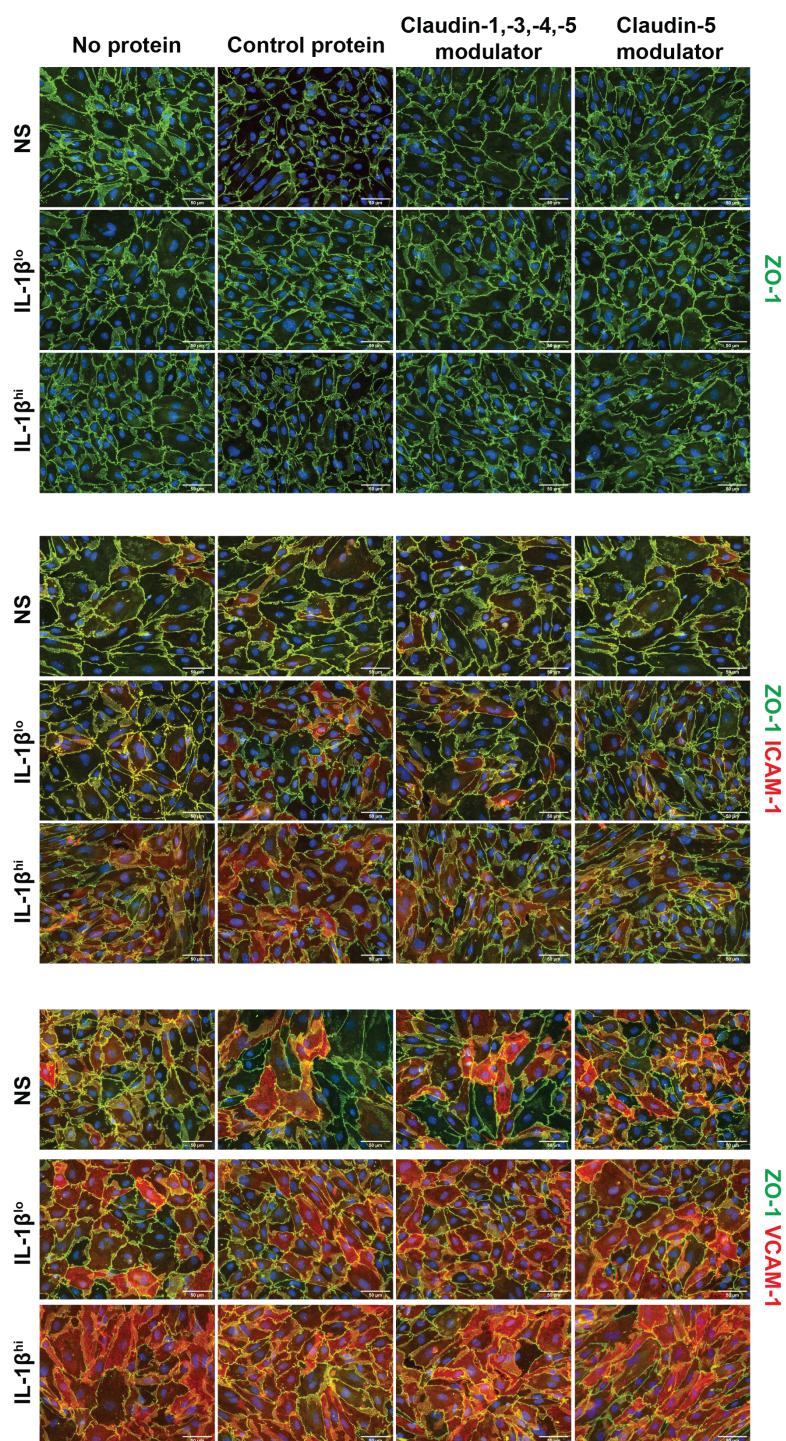

**Figure S6 - Targeting endothelial claudin-5 decreases paracellular T-cell diapedesis across bicellular junctions**

Immunofluorescence staining of ZO-1 (green) and ICAM-1 and VCAM-1 (red) in pMBMEC monolayers. Comparable staining was obtained for these proteins, in either non stimulated (NS), IL-1 $\beta$ <sup>lo</sup> or IL-1 $\beta$ <sup>hi</sup> stimulated pMBMECs, in the presence or absence of the cCPE proteins. Nuclei were stained with DAPI in blue. Three independent experiments were performed. Scale bar = 50 $\mu$ m.

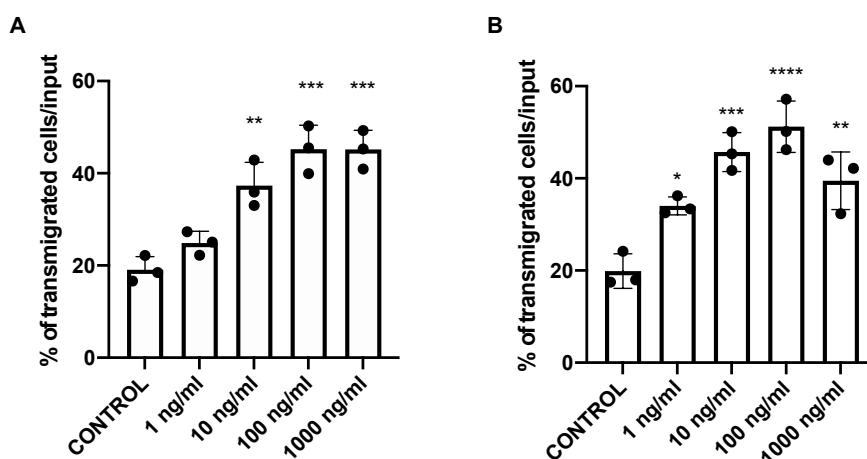

**Figure S7- Th1 cells chemotaxis towards CCL2 and CCL5.**

The percentage of Th1 cells that have migrated over 2 hours across laminin coated 5  $\mu$ m pore size Millicell filters towards 0 (CONTROL), 1, 10, 100, 1000 ng/mL recombinant mouse CCL2 (a) and recombinant mouse CCL5 (b) in the bottom compartment. Statistical analysis: one-way ANOVA followed by Tukey's multiple comparison test ( $p < 0.05 = *$ ,  $p < 0.01 = **$ ,  $p < 0.001 = ***$ ,  $p < 0.0001 = ****$ ). Each figure shows mean + SD of one representative experiment done in triplicates.
